# Supplementary material for: Comparison of 18F-FES, 18F-FDG, and 18F-FMISO PET Imaging Probes for Early Prediction and Monitoring of Response to Endocrine Therapy in a Mouse Xenograft Model of ER-Positive Breast Cancer
Source: PubMed Central journal article supplement (PMC4965120; doi:10.1371/journal.pone.0159916), 2016-07-28
Supplement: pone.0159916.s001.pdf [file pone.0159916.s001.pdf]

**S1 File. Data of tumor volume (mm<sup>3</sup>).**

**Table A. Data of tumor volume in vehicle group**

| Vehicle Group | Mice 1 | Mice 2 | Mice 3 | Mice 4 | Mice 5 | Mice 6 |
|---------------|--------|--------|--------|--------|--------|--------|
| d0            | 184    | 212    | 190    | 287    | 40     | 135    |
| d3            | 267    | 313    | 183    | 346    | 186    | 203    |
| d7            | 322    | 214    | 213    | 310    | 394    | 200    |
| d14           | 786    | 714    | 746    | 700    | 780    | 602    |
| d21           | 1228   | 857    | 1069   | 1130   | 988    | 955    |

**Table B. Data of tumor volume in fulvestrant group**

| Fulvestrant Group | Mice 1 | Mice 2 | Mice 3 | Mice 4 | Mice 5 | Mice 6 |
|-------------------|--------|--------|--------|--------|--------|--------|
| d0                | 145    | 130    | 120    | 203    | 100    | 157    |
| d3                | 186    | 188    | 224    | 206    | 207    | 186    |
| d7                | 245    | 225    | 214    | 216    | 269    | 127    |
| d14               | 303    | 303    | 626    | 328    | 336    | 171    |
| d21               | 562    | 610    | 774    | 550    | 482    | 247    |
