# Supplementary material for: Comparison of 18F-FES, 18F-FDG, and 18F-FMISO PET Imaging Probes for Early Prediction and Monitoring of Response to Endocrine Therapy in a Mouse Xenograft Model of ER-Positive Breast Cancer
Source: PubMed Central journal article supplement (PMC4965120; doi:10.1371/journal.pone.0159916), 2016-07-28
Supplement: pone.0159916.s002.pdf [file pone.0159916.s002.pdf]

S2 File.  $^{18}\text{F}$ -FES MicroPET/CT imaging and quantitative value (%ID/ $g_{\text{max}}$ , T/M).

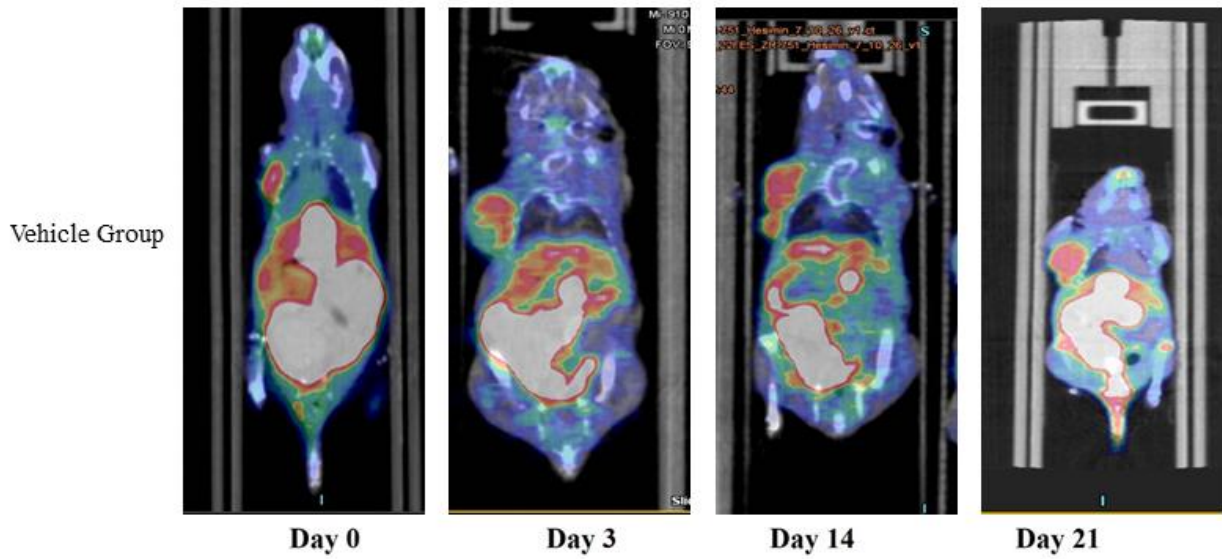

Figure A.  $^{18}\text{F}$ -FES MicroPET/CT imaging in vehicle group

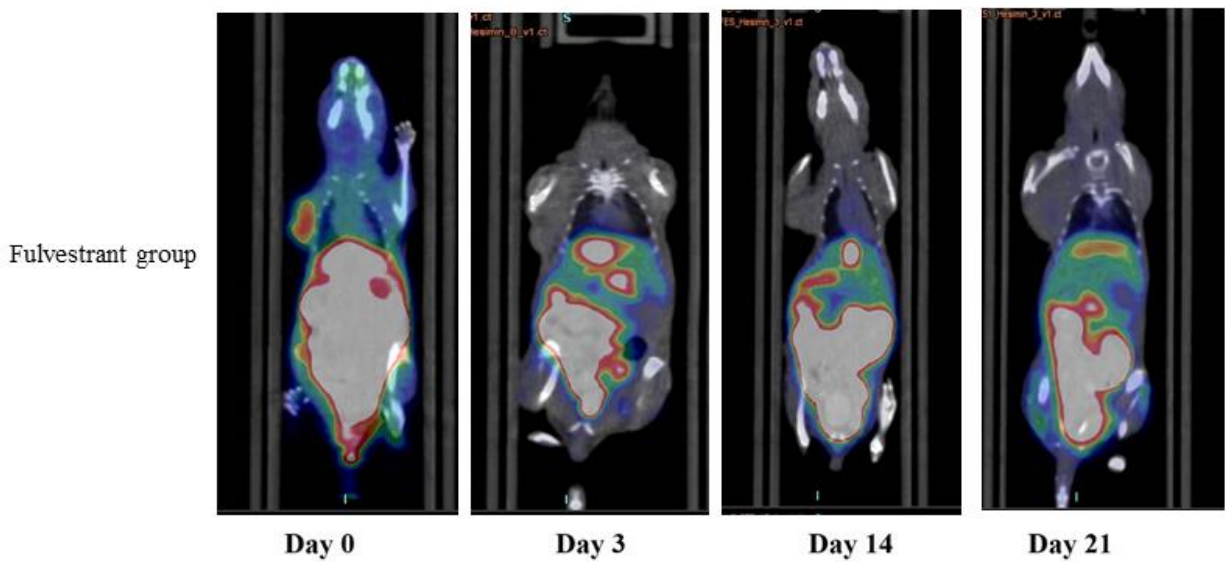

Figure B.  $^{18}\text{F}$ -FES MicroPET/CT imaging in fulvestrant group

**Table A. Quantitative value of  $^{18}\text{F}$ -FES %ID/g<sub>max</sub> in vehicle group**

| Vehicle Group | %ID/g <sub>max</sub> of $^{18}\text{F}$ -FES |       |        |        |
|---------------|----------------------------------------------|-------|--------|--------|
|               | Day 0                                        | Day 3 | Day 14 | Day 21 |
| Mice 1        | 3.9                                          | 3.9   | 3.9    | 3.9    |
| Mice 2        | 3                                            | 3.3   | 3.5    | 4.8    |
| Mice 3        | 3.4                                          | 3.5   | 3.6    | 4.2    |
| Mice 4        | 4.4                                          | 4.5   | 4.5    | 4.2    |
| Mice 5        | 4.9                                          | 5     | 5      | 4      |

**Table B. Quantitative value of  $^{18}\text{F}$ -FES %ID/g<sub>max</sub> in fulvestrant group**

| Fulvestrant Group | %ID/g <sub>max</sub> of $^{18}\text{F}$ -FES |       |        |        |
|-------------------|----------------------------------------------|-------|--------|--------|
|                   | Day 0                                        | Day 3 | Day 14 | Day 21 |
| Mice 1            | 3.9                                          | 1     | 1.1    | 0.8    |
| Mice 2            | 3                                            | 0.3   | 0.3    | 0.3    |
| Mice 3            | 3.4                                          | 0.3   | 0.3    | 0.5    |
| Mice 4            | 4.4                                          | 0.8   | 0.3    | 0.3    |
| Mice 5            | 4.9                                          | 0.2   | 0.5    | 0.4    |

**Table C. Quantitative value of  $^{18}\text{F}$ -FES T/M in vehicle group**

| Vehicle Group | T/M of $^{18}\text{F}$ -FES |       |        |        |
|---------------|-----------------------------|-------|--------|--------|
|               | Day 0                       | Day 3 | Day 14 | Day 21 |
| Mice 1        | 3                           | 3.2   | 3.5    | 3.8    |
| Mice 2        | 4.2                         | 4.3   | 4.5    | 4.6    |
| Mice 3        | 4.2                         | 4.3   | 4.5    | 4.7    |
| Mice 4        | 4                           | 4.2   | 4.5    | 4.5    |
| Mice 5        | 4.4                         | 4.5   | 4.7    | 5      |

**Table D. Quantitative value of  $^{18}\text{F}$ -FES T/M in fulvestrant group**

| <b>Fulvestrant<br/>Group</b> | <b>T/M of <math>^{18}\text{F}</math>-FES</b> |       |        |        |
|------------------------------|----------------------------------------------|-------|--------|--------|
|                              | Day 0                                        | Day 3 | Day 14 | Day 21 |
| Mice 1                       | 5.1                                          | 2.5   | 2.2    | 2.6    |
| Mice 2                       | 3.2                                          | 1.5   | 1.5    | 1.5    |
| Mice 3                       | 5.6                                          | 3     | 3      | 2.5    |
| Mice 4                       | 4.6                                          | 2.6   | 1.5    | 1.5    |
| Mice 5                       | 5                                            | 2     | 2      | 1.5    |
