# Supplementary material for: Comparison of 18F-FES, 18F-FDG, and 18F-FMISO PET Imaging Probes for Early Prediction and Monitoring of Response to Endocrine Therapy in a Mouse Xenograft Model of ER-Positive Breast Cancer
Source: PubMed Central journal article supplement (PMC4965120; doi:10.1371/journal.pone.0159916), 2016-07-28
Supplement: pone.0159916.s004.pdf [file pone.0159916.s004.pdf]

S4 File.  $^{18}\text{F}$ -FMISO MicroPET/CT imaging and quantitative value ( $\%ID/g_{\text{max}}$ , T/M).

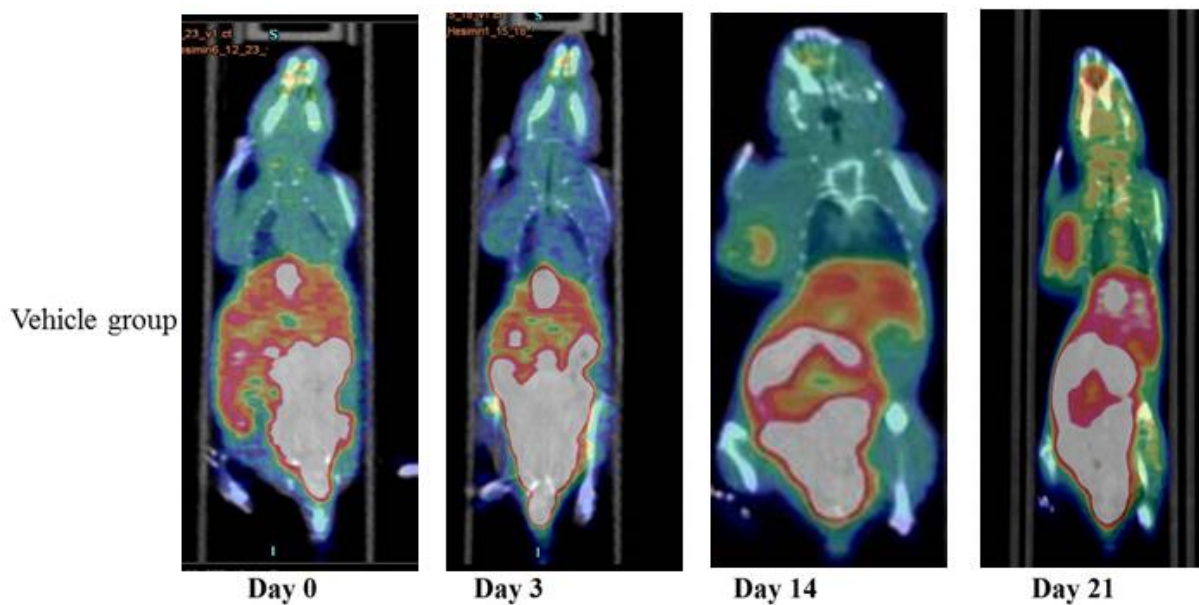

Figure A.  $^{18}\text{F}$ -FMISO MicroPET/CT imaging in vehicle group

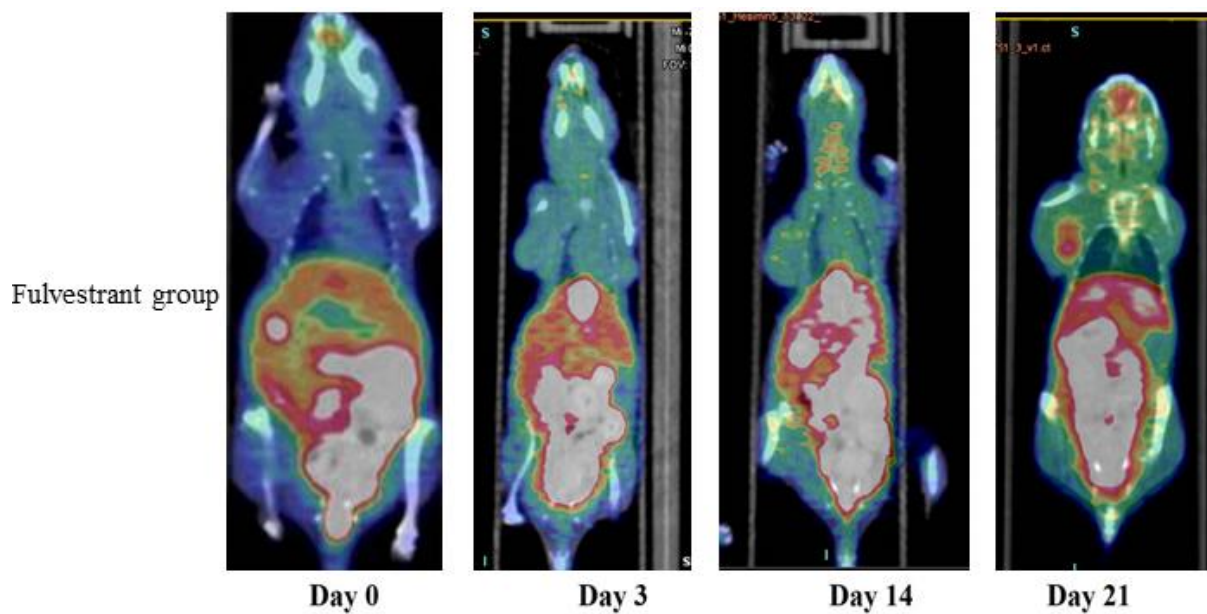

Figure B.  $^{18}\text{F}$ -FMISO MicroPET/CT imaging in fulvestrant group

**Table A. Quantitative value of  $^{18}\text{F}$ -FMISO %ID/g<sub>max</sub> in vehicle group**

| <b>Vehicle Group</b> | <b>%ID/g<sub>max</sub> of <math>^{18}\text{F}</math>-FMISO</b> |       |        |        |
|----------------------|----------------------------------------------------------------|-------|--------|--------|
|                      | Day 0                                                          | Day 3 | Day 14 | Day 21 |
| Mice 1               | 1.4                                                            | 2.2   | 2.3    | 3.5    |
| Mice 2               | 1.5                                                            | 2.1   | 2.3    | 6.3    |
| Mice 3               | 1.5                                                            | 2.6   | 3.7    | 5.6    |
| Mice 4               | 1.6                                                            | 2     | 2.3    | 6.3    |
| Mice 5               | 2.6                                                            | 4.3   | 2.4    | 3.6    |

**Table B. Quantitative value of  $^{18}\text{F}$ -FMISO %ID/g<sub>max</sub> in fulvestrant group**

| <b>Fulvestran Group</b> | <b>%ID/g<sub>max</sub> of <math>^{18}\text{F}</math>-FMISO</b> |       |        |        |
|-------------------------|----------------------------------------------------------------|-------|--------|--------|
|                         | Day 0                                                          | Day 3 | Day 14 | Day 21 |
| Mice 1                  | 1.5                                                            | 1.3   | 3.3    | 6.2    |
| Mice 2                  | 1.6                                                            | 0.9   | 1.3    | 1.7    |
| Mice 3                  | 1.7                                                            | 1.3   | 1.5    | 5.2    |
| Mice 4                  | 1.8                                                            | 0.8   | 2.3    | 2.3    |
| Mice 5                  | 1.2                                                            | 1.8   | 3.5    | 3.8    |

**Table C. Quantitative value of  $^{18}\text{F}$ -FMISO T/M in vehicle group**

| <b>Vehicle Group</b> | <b>T/M of <math>^{18}\text{F}</math>-FMISO</b> |       |        |        |
|----------------------|------------------------------------------------|-------|--------|--------|
|                      | Day 0                                          | Day 3 | Day 14 | Day 21 |
| Mice 1               | 1.4                                            | 1.4   | 1.2    | 1.9    |
| Mice 2               | 1.4                                            | 1.6   | 1.8    | 3.7    |
| Mice 3               | 1.3                                            | 1.6   | 1.7    | 3.2    |
| Mice 4               | 1.5                                            | 1.1   | 1.1    | 5.2    |
| Mice 5               | 1.4                                            | 1.5   | 2.1    | 1.9    |

**Table D. Quantitative value of  $^{18}\text{F}$ -FMISO T/M in fulvestrant group**

| <b>Fulvestran<br/>Group</b> | <b>T/M of <math>^{18}\text{F}</math>-FMISO</b> |       |        |        |
|-----------------------------|------------------------------------------------|-------|--------|--------|
|                             | Day 0                                          | Day 3 | Day 14 | Day 21 |
| Mice 1                      | 1                                              | 1     | 3      | 3.8    |
| Mice 2                      | 1.2                                            | 1     | 1      | 1      |
| Mice 3                      | 1                                              | 1     | 1.1    | 2.7    |
| Mice 4                      | 1.8                                            | 1.6   | 1.9    | 1.2    |
| Mice 5                      | 2                                              | 1.2   | 1.7    | 2.1    |
