# Supplementary material for: Comparison of 18F-FES, 18F-FDG, and 18F-FMISO PET Imaging Probes for Early Prediction and Monitoring of Response to Endocrine Therapy in a Mouse Xenograft Model of ER-Positive Breast Cancer
Source: PubMed Central journal article supplement (PMC4965120; doi:10.1371/journal.pone.0159916), 2016-07-28
Supplement: pone.0159916.s005.pdf [file pone.0159916.s005.pdf]

**Table A. Correlation data of ER $\alpha$  score and  $^{18}\text{F}$ -FES uptake value (%ID/g<sub>max</sub>, T/M).**

| $^{18}\text{F}$ -FES uptake |     | ER $\alpha$<br>score |
|-----------------------------|-----|----------------------|
| %ID/g <sub>max</sub>        | T/M |                      |
| 4.9                         | 5.1 | 1                    |
| 0.2                         | 2.5 | 0                    |
| 0.5                         | 2.2 | 0                    |
| 0.4                         | 2.6 | 0                    |
| 4.9                         | 4.4 | 2                    |
| 5                           | 4.5 | 3                    |
| 5                           | 4.7 | 3                    |
| 4                           | 5   | 3                    |
